# Supplementary material
Source: PubMed Central journal article supplement (PMC8632705)
Supplement: mmc1.pdf [file mmc1.pdf]

# THE LANCET

## Respiratory Medicine

### Supplementary appendix

This appendix formed part of the original submission and has been peer reviewed. We post it as supplied by the authors.

Supplement to: Agrawal U, Katikireddi SV, McCowan C, et al. COVID-19 hospital admissions and deaths after BNT162b2 and ChAdOx1 nCoV-19 vaccinations in 2·57 million people in Scotland (EAVE II): a prospective cohort study. *Lancet Respir Med* 2021; published online Sept 29. [https://doi.org/10.1016/S2213-2600\(21\)00380-5](https://doi.org/10.1016/S2213-2600(21)00380-5).

## Supplemental File S1: Context of vaccine roll-out in Scotland

**Supplemental Table 1.** Joint Committee on Vaccination and Immunisation (JCVI) COVID-19 vaccination priority list on 30 December 2020

| Order of priority | Group*                                                                                                                                     | Date rollout of vaccine commenced |
|-------------------|--------------------------------------------------------------------------------------------------------------------------------------------|-----------------------------------|
| 1                 | Residents in a care home for older adults and their carers                                                                                 | 8 <sup>th</sup> December 2020     |
| 2                 | All those 80 years of age and over and frontline health and social care workers                                                            |                                   |
| 3                 | All those 75 years of age and over                                                                                                         |                                   |
| 4                 | All those 70 years of age and over and clinically extremely vulnerable individuals                                                         |                                   |
| 5                 | All those 65 years of age and over                                                                                                         |                                   |
| 6                 | All individuals aged 16 years to 64 years with underlying health conditions which put them at higher risk of serious disease and mortality |                                   |
| 7                 | All those 60 years of age and over                                                                                                         |                                   |
| 8                 | All those 55 years of age and over                                                                                                         |                                   |
| 9                 | All those 50 years of age and over                                                                                                         |                                   |

\*These groups represent around 99% of preventable mortality from COVID-19

The vaccine roll-out strategy has been determined by an independent UK-wide body, namely the Joint Commission on Vaccinations and Immunisation (JCVI),[1] which has prioritised vaccinations to adults on the basis of assessing the risk of serious COVID-19 outcomes, in particular hospitalisations and deaths.[1]

Individuals in these priority groups received a written invitation ~14 days before their appointment. They were asked however to delay their vaccination if they had recently had COVID-19, tested positive or were self-isolating. These invitations were accompanied by written advice on the need to observe behavioural measures to reduce the risk of contracting the infection.

Prior to vaccination, checks were made by the trained administering staff to see if individuals had COVID-19 or tested positive in the preceding 4 weeks; if so, the vaccination was deferred. Immediately following vaccination, individuals received both verbal and written advice on the need to maintain behavioural measures, particularly in the 2-3 weeks following vaccination.

Because of the different storage requirements for the two vaccines, GPs have administered the Oxford-AstraZeneca vaccine and vaccine centres have mainly administered the Pfizer-BioNTech vaccine. Guided by JCVI priorities, GPs began by focusing their efforts on: a) the mobile elderly who they vaccinated in their general practice surgeries; and b) care home residents affiliated with general practices. Vaccination centres began with focusing on health and social care providers before extending to other

JCVI priority groups. By February 22nd 2021, Group 7 vaccination was underway and a full roll-out of invitations to Group 6 (Supplemental Table 1) started.

[7] Joint Committee on Vaccination and Immunisation. Priority groups for coronavirus (COVID-19) vaccination: advice from the JCVI, 30 December 2020. Available from:

<https://www.gov.uk/government/publications/priority-groups-for-coronavirus-covid-19-vaccination-advice-from-the-jcvi-30-december-2020>

**Table 2: ICD-10 codes for COVID-19 illness**

| <b>Code</b>                                                                                                                                                                                                                                               | <b>Description</b>                                                |
|-----------------------------------------------------------------------------------------------------------------------------------------------------------------------------------------------------------------------------------------------------------|-------------------------------------------------------------------|
| U07.1                                                                                                                                                                                                                                                     | COVID-19, virus identified                                        |
| U07.2                                                                                                                                                                                                                                                     | COVID-19, virus not identified                                    |
| B34.2                                                                                                                                                                                                                                                     | Coronavirus infection, unspecified site                           |
| B97.2                                                                                                                                                                                                                                                     | Coronavirus as the cause of diseases classified to other chapters |
| Source: <a href="https://www.isdscotland.org/Products-and-Services/Terminology-Services/docs/COVID-19-Analytical-Guidance-V1-2.pdf">https://www.isdscotland.org/Products-and-Services/Terminology-Services/docs/COVID-19-Analytical-Guidance-V1-2.pdf</a> |                                                                   |

**Table 3: STROBE and RECORD checklists**

|                           | <b>Item No.</b> | <b>STROBE items</b>                                                                                                                                                                                                                                                                                                                             | <b>RECORD items</b>                                                                                                                                                                                                                                                                                                                                                                                                                 | <b>Location in manuscript where items are reported</b> |
|---------------------------|-----------------|-------------------------------------------------------------------------------------------------------------------------------------------------------------------------------------------------------------------------------------------------------------------------------------------------------------------------------------------------|-------------------------------------------------------------------------------------------------------------------------------------------------------------------------------------------------------------------------------------------------------------------------------------------------------------------------------------------------------------------------------------------------------------------------------------|--------------------------------------------------------|
| <b>Title and abstract</b> |                 |                                                                                                                                                                                                                                                                                                                                                 |                                                                                                                                                                                                                                                                                                                                                                                                                                     |                                                        |
|                           | 1               | (a) Indicate the study’s design with a commonly used term in the title or the abstract (b) Provide in the abstract an informative and balanced summary of what was done and what was found                                                                                                                                                      | RECORD 1.1: The type of data used should be specified in the title or abstract. When possible, the name of the databases used should be included.<br>RECORD 1.2: If applicable, the geographic region and timeframe within which the study took place should be reported in the title or abstract.<br>RECORD 1.3: If linkage between databases was conducted for the study, this should be clearly stated in the title or abstract. | p. 1                                                   |
| <b>Introduction</b>       |                 |                                                                                                                                                                                                                                                                                                                                                 |                                                                                                                                                                                                                                                                                                                                                                                                                                     |                                                        |
| Background rationale      | 2               | Explain the scientific background and rationale for the investigation being reported                                                                                                                                                                                                                                                            |                                                                                                                                                                                                                                                                                                                                                                                                                                     | p. 1-3                                                 |
| Objectives                | 3               | State specific objectives, including any prespecified hypotheses                                                                                                                                                                                                                                                                                |                                                                                                                                                                                                                                                                                                                                                                                                                                     | p. 1-3                                                 |
| <b>Methods</b>            |                 |                                                                                                                                                                                                                                                                                                                                                 |                                                                                                                                                                                                                                                                                                                                                                                                                                     |                                                        |
| Study Design              | 4               | Present key elements of study design early in the paper                                                                                                                                                                                                                                                                                         |                                                                                                                                                                                                                                                                                                                                                                                                                                     | p. 3                                                   |
| Setting                   | 5               | Describe the setting, locations, and relevant dates, including periods of recruitment, exposure, follow-up, and data collection                                                                                                                                                                                                                 |                                                                                                                                                                                                                                                                                                                                                                                                                                     | p. 3-5                                                 |
| Participants              | 6               | (a) <i>Cohort study</i> - Give the eligibility criteria, and the sources and methods of selection of participants. Describe methods of follow-up<br><i>Case-control study</i> - Give the eligibility criteria, and the sources and methods of case ascertainment and control selection. Give the rationale for the choice of cases and controls | RECORD 6.1: The methods of study population selection (such as codes or algorithms used to identify subjects) should be listed in detail. If this is not possible, an explanation should be provided.<br>RECORD 6.2: Any validation studies of the codes or algorithms used to select the population should be referenced. If validation was conducted for this study and                                                           | p. 3-5                                                 |

|                              |    |                                                                                                                                                                                                                                                                                                                                                                   |                                                                                                                                                                                                                                                                                                                        |        |
|------------------------------|----|-------------------------------------------------------------------------------------------------------------------------------------------------------------------------------------------------------------------------------------------------------------------------------------------------------------------------------------------------------------------|------------------------------------------------------------------------------------------------------------------------------------------------------------------------------------------------------------------------------------------------------------------------------------------------------------------------|--------|
|                              |    | <p><i>Cross-sectional study</i> - Give the eligibility criteria, and the sources and methods of selection of participants</p> <p>(b) <i>Cohort study</i> - For matched studies, give matching criteria and number of exposed and unexposed</p> <p><i>Case-control study</i> - For matched studies, give matching criteria and the number of controls per case</p> | <p>not published elsewhere, detailed methods and results should be provided.</p> <p>RECORD 6.3: If the study involved linkage of databases, consider use of a flow diagram or other graphical display to demonstrate the data linkage process, including the number of individuals with linked data at each stage.</p> |        |
| Variables                    | 7  | Clearly define all outcomes, exposures, predictors, potential confounders, and effect modifiers. Give diagnostic criteria, if applicable.                                                                                                                                                                                                                         | RECORD 7.1: A complete list of codes and algorithms used to classify exposures, outcomes, confounders, and effect modifiers should be provided. If these cannot be reported, an explanation should be provided.                                                                                                        | p.3-5  |
| Data sources/<br>measurement | 8  | For each variable of interest, give sources of data and details of methods of assessment (measurement). Describe comparability of assessment methods if there is more than one group                                                                                                                                                                              |                                                                                                                                                                                                                                                                                                                        | p. 3-4 |
| Bias                         | 9  | Describe any efforts to address potential sources of bias                                                                                                                                                                                                                                                                                                         |                                                                                                                                                                                                                                                                                                                        | p. 4-5 |
| Study size                   | 10 | Explain how the study size was arrived at                                                                                                                                                                                                                                                                                                                         |                                                                                                                                                                                                                                                                                                                        | N/A    |
| Quantitative variables       | 11 | Explain how quantitative variables were handled in the analyses. If applicable, describe which groupings were chosen, and why                                                                                                                                                                                                                                     |                                                                                                                                                                                                                                                                                                                        | p. 3-5 |
| Statistical methods          | 12 | <p>(a) Describe all statistical methods, including those used to control for confounding</p> <p>(b) Describe any methods used to examine subgroups and interactions</p> <p>(c) Explain how missing data were addressed</p> <p>(d) <i>Cohort study</i> - If applicable, explain how loss to follow-up was addressed</p>                                            |                                                                                                                                                                                                                                                                                                                        | p. 5-6 |

|                                  |    |                                                                                                                                                                                                                                                                                                                                                            |                                                                                                                                                                                                                                                                                                                    |        |
|----------------------------------|----|------------------------------------------------------------------------------------------------------------------------------------------------------------------------------------------------------------------------------------------------------------------------------------------------------------------------------------------------------------|--------------------------------------------------------------------------------------------------------------------------------------------------------------------------------------------------------------------------------------------------------------------------------------------------------------------|--------|
|                                  |    | <p><i>Case-control study</i> - If applicable, explain how matching of cases and controls was addressed</p> <p><i>Cross-sectional study</i> - If applicable, describe analytical methods taking account of sampling strategy</p> <p>(e) Describe any sensitivity analyses</p>                                                                               |                                                                                                                                                                                                                                                                                                                    |        |
| Data access and cleaning methods |    | ..                                                                                                                                                                                                                                                                                                                                                         | <p>RECORD 12.1: Authors should describe the extent to which the investigators had access to the database population used to create the study population.</p> <p>RECORD 12.2: Authors should provide information on the data cleaning methods used in the study.</p>                                                | 3-5    |
| Linkage                          |    | ..                                                                                                                                                                                                                                                                                                                                                         | RECORD 12.3: State whether the study included person-level, institutional-level, or other data linkage across two or more databases. The methods of linkage and methods of linkage quality evaluation should be provided.                                                                                          | p. 3-5 |
| <b>Results</b>                   |    |                                                                                                                                                                                                                                                                                                                                                            |                                                                                                                                                                                                                                                                                                                    |        |
| Participants                     | 13 | <p>(a) Report the numbers of individuals at each stage of the study (<i>e.g.</i>, numbers potentially eligible, examined for eligibility, confirmed eligible, included in the study, completing follow-up, and analysed)</p> <p>(b) Give reasons for non-participation at each stage.</p> <p>(c) Consider use of a flow diagram</p>                        | RECORD 13.1: Describe in detail the selection of the persons included in the study ( <i>i.e.</i> , study population selection) including filtering based on data quality, data availability and linkage. The selection of included persons can be described in the text and/or by means of the study flow diagram. | p. 6-7 |
| Descriptive data                 | 14 | <p>(a) Give characteristics of study participants (<i>e.g.</i>, demographic, clinical, social) and information on exposures and potential confounders</p> <p>(b) Indicate the number of participants with missing data for each variable of interest</p> <p>(c) <i>Cohort study</i> - summarise follow-up time (<i>e.g.</i>, average and total amount)</p> |                                                                                                                                                                                                                                                                                                                    | p. 6   |



|                   |    |                                                                                                                                                                                                                                                                                                                                                                                                                                |                                                                                                                                                           |        |
|-------------------|----|--------------------------------------------------------------------------------------------------------------------------------------------------------------------------------------------------------------------------------------------------------------------------------------------------------------------------------------------------------------------------------------------------------------------------------|-----------------------------------------------------------------------------------------------------------------------------------------------------------|--------|
| Outcome data      | 15 | <p><i>Cohort study</i> - Report numbers of outcome events or summary measures over time</p> <p><i>Case-control study</i> - Report numbers in each exposure category, or summary measures of exposure</p> <p><i>Cross-sectional study</i> - Report numbers of outcome events or summary measures</p>                                                                                                                            |                                                                                                                                                           | p. 6-7 |
| Main results      | 16 | <p>(a) Give unadjusted estimates and, if applicable, confounder-adjusted estimates and their precision (e.g., 95% confidence interval). Make clear which confounders were adjusted for and why they were included</p> <p>(b) Report category boundaries when continuous variables were categorized</p> <p>(c) If relevant, consider translating estimates of relative risk into absolute risk for a meaningful time period</p> |                                                                                                                                                           | p. 6-7 |
| Other analyses    | 17 | Report other analyses done—e.g., analyses of subgroups and interactions, and sensitivity analyses                                                                                                                                                                                                                                                                                                                              |                                                                                                                                                           | p. 6-7 |
| <b>Discussion</b> |    |                                                                                                                                                                                                                                                                                                                                                                                                                                |                                                                                                                                                           |        |
| Key results       | 18 | Summarise key results with reference to study objectives                                                                                                                                                                                                                                                                                                                                                                       |                                                                                                                                                           | p. 7-9 |
| Limitations       | 19 | Discuss limitations of the study, taking into account sources of potential bias or                                                                                                                                                                                                                                                                                                                                             | RECORD 19.1: Discuss the implications of using data that were not created or collected to answer the specific research question(s). Include discussion of | p. 9   |

|                                                           |    |                                                                                                                                                                            |                                                                                                                                                          |           |
|-----------------------------------------------------------|----|----------------------------------------------------------------------------------------------------------------------------------------------------------------------------|----------------------------------------------------------------------------------------------------------------------------------------------------------|-----------|
|                                                           |    | imprecision. Discuss both direction and magnitude of any potential bias                                                                                                    | misclassification bias, unmeasured confounding, missing data, and changing eligibility over time, as they pertain to the study being reported.           |           |
| Interpretation                                            | 20 | Give a cautious overall interpretation of results considering objectives, limitations, multiplicity of analyses, results from similar studies, and other relevant evidence |                                                                                                                                                          | p. 7-10   |
| Generalisability                                          | 21 | Discuss the generalisability (external validity) of the study results                                                                                                      |                                                                                                                                                          | p. 8-10   |
| <b>Other Information</b>                                  |    |                                                                                                                                                                            |                                                                                                                                                          |           |
| Funding                                                   | 22 | Give the source of funding and the role of the funders for the present study and, if applicable, for the original study on which the present article is based              |                                                                                                                                                          | p. 1,6,10 |
| Accessibility of protocol, raw data, and programming code |    | ..                                                                                                                                                                         | RECORD 22.1: Authors should provide information on how to access any supplemental information such as the study protocol, raw data, or programming code. | p. 10     |

**Table 4: Characteristics of individuals in Scotland with first vaccination who were hospitalised or died due to COVID-19 (including events <14 days post-vaccination)**

| Characteristic            | Total vaccination coverage | Hospitalisation or death due to COVID-19 <14 days of first vaccination (% of total) |            |             |
|---------------------------|----------------------------|-------------------------------------------------------------------------------------|------------|-------------|
|                           |                            | Both vaccines                                                                       | BNT162b2   | ChAdOx1     |
| Total                     | 2,572,655                  | 1843                                                                                | 824        | 1019        |
| Sex                       |                            |                                                                                     |            |             |
| Female                    | 1,418,641 (55.1)           | 1017 (55.2)                                                                         | 473 (57.4) | 544 (53.4)  |
| Male                      | 1,154,014 (44.9)           | 826 (44.8)                                                                          | 351 (42.6) | 475 (46.6)  |
| Age group (years)         |                            |                                                                                     |            |             |
| 18-64                     | 1,659,828 (64.5)           | 403 (21.9)                                                                          | 183 (22.2) | 220 (21.6)  |
| 65-79                     | 697,687 (27.1)             | 509 (27.6)                                                                          | 231 (28.0) | 278 (27.3)  |
| >=80                      | 215,140 (8.4)              | 931 (50.5)                                                                          | 410 (49.8) | 521 (51.1)  |
| Prior history of COVID-19 |                            |                                                                                     |            |             |
| No                        | 2,488,904 (96.7)           | 1784 (96.8)                                                                         | 781 (94.8) | 1003 (98.4) |

|                                  |                  |             |            |             |
|----------------------------------|------------------|-------------|------------|-------------|
| Yes                              | 83,751 (3.3)     | 59 (3.2)    | 43 (5.2)   | 16 (1.6)    |
| Prior history of hospitalisation |                  |             |            |             |
| No                               | 2,511,840 (97.6) | 1627 (88.3) | 769 (93.3) | 858 (84.2)  |
| Yes                              | 60,815 (2.4)     | 216 (11.7)  | 55 (6.7)   | 161 (15.8)  |
| Elderly care home                |                  |             |            |             |
| No                               | 2,553,387 (99.3) | 1518 (82.4) | 504 (61.2) | 1014 (99.5) |
| Yes                              | 19,268 (0.7)     | 325 (17.6)  | 320 (38.8) | 5 (0.5)     |
| Deprivation status †             |                  |             |            |             |
| 1 – Most deprived                | 469,021 (18.2)   | 514 (27.9)  | 206 (25.0) | 308 (30.2)  |
| 2                                | 504,965 (19.6)   | 440 (23.9)  | 186 (22.6) | 254 (24.9)  |
| 3                                | 526,160 (20.5)   | 298 (16.2)  | 157 (19.1) | 141 (13.8)  |
| 4                                | 537,760 (20.9)   | 291 (15.8)  | 148 (18.0) | 143 (14.0)  |
| 5 – Least deprived               | 521,313 (20.3)   | 281 (15.2)  | 111 (13.5) | 170 (16.7)  |
| Unknown                          | 13,436 (0.5)     | 19 (1.0)    | 16 (1.9)   | 3 (0.3)     |

| Urban/rural score       |                |            |            |            |
|-------------------------|----------------|------------|------------|------------|
| 1 – Large urban area    | 776,279 (30.3) | 594 (32.6) | 232 (28.7) | 362 (35.6) |
| 2                       | 991,272 (38.7) | 733 (42.4) | 340 (42.1) | 433 (42.6) |
| 3                       | 258,072 (10.1) | 168 (9.2)  | 65 (8.0)   | 103 (10.1) |
| 4                       | 138,908 (5.4)  | 75 (4.1)   | 47 (5.8)   | 28 (2.8)   |
| 5                       | 248,265 (9.7)  | 171 (9.4)  | 101 (12.5) | 70 (6.9)   |
| 6 – Remote rural area   | 146,423 (5.7)  | 43 (2.4)   | 23 (2.8)   | 20 (2.0)   |
| Unknown                 | 13,436 (0.5)   | 19 (1.0)   | 16 (1.9)   | 3 (0.3)    |
| Smoking status          |                |            |            |            |
| Ex-smoker               | 432,946 (16.8) | 466 (25.3) | 182 (22.1) | 284 (27.9) |
| Non-smoker              | 999,744 (38.9) | 612 (33.2) | 266 (32.3) | 346 (34.0) |
| Smoker                  | 621,735 (24.2) | 477 (25.9) | 182 (22.1) | 295 (28.9) |
| Unknown                 | 518,230 (20.1) | 288 (15.6) | 194 (23.5) | 94 (9.2)   |
| Number of comorbidities |                |            |            |            |

|                            |                  |            |            |            |
|----------------------------|------------------|------------|------------|------------|
| 0                          | 1,233,347 (47.9) | 300 (16.3) | 130 (15.8) | 170 (16.7) |
| 1                          | 760,383 (29.6)   | 347 (18.8) | 134 (16.3) | 213 (20.9) |
| 2                          | 338,082 (13.1)   | 383 (20.8) | 166 (20.1) | 217 (21.3) |
| 3                          | 141,296 (5.5)    | 332 (18.0) | 158 (19.2) | 174 (17.1) |
| 4                          | 60,233 (2.3)     | 215 (11.7) | 104 (12.6) | 111 (10.9) |
| ≥5                         | 39,314 (1.5)     | 266 (14.4) | 132 (16.0) | 134 (13.2) |
| Number of previous tests § |                  |            |            |            |
| 0                          | 2,059,974 (80.1) | 885 (48.0) | 240 (29.1) | 645 (63.3) |
| 1                          | 313,118 (12.2)   | 272 (14.8) | 126 (15.3) | 146 (14.3) |
| 2                          | 78,277 (3.0)     | 157 (8.5)  | 84 (10.2)  | 73 (7.2)   |
| 3                          | 29,445 (1.1)     | 134 (7.3)  | 99 (12.0)  | 35 (3.4)   |
| 4-9                        | 47,525 (1.8)     | 285 (15.5) | 193 (23.4) | 92 (9.0)   |
| 10+                        | 44,316 (1.7)     | 110 (6.0)  | 82 (10.0)  | 28 (2.7)   |
| Asthma                     | 352,773 (13.7)   | 270 (14.7) | 86 (10.4)  | 184 (18.1) |

|                                                                                                                                                                                                                                                         |               |            |            |            |
|---------------------------------------------------------------------------------------------------------------------------------------------------------------------------------------------------------------------------------------------------------|---------------|------------|------------|------------|
| Chronic kidney disease (stages 3-5)*                                                                                                                                                                                                                    | 152,138 (5.9) | 487 (26.4) | 189 (22.9) | 298 (29.2) |
| Liver cirrhosis                                                                                                                                                                                                                                         | 20,307 (0.8)  | 22 (1.2)   | 6 (0.7)    | 16 (1.6)   |
| Chronic neurological condition                                                                                                                                                                                                                          | 16,903 (0.3)  | 15 (0.8)   | 8 (1.0)    | 7 (0.7)    |
| Heart failure                                                                                                                                                                                                                                           | 44,710 (1.7)  | 141 (7.7)  | 44 (5.3)   | 97 (9.5)   |
| Diabetes (type 1)                                                                                                                                                                                                                                       | 20,331 (0.8)  | 14 (0.8)   | 5 (0.6)    | 9 (0.9)    |
| Diabetes (type 2)                                                                                                                                                                                                                                       | 244,070 (9.5) | 440 (23.9) | 169 (20.5) | 271 (26.6) |
| Dementia                                                                                                                                                                                                                                                | 34,642 (1.3)  | 349 (18.9) | 280 (34.0) | 69 (6.8)   |
| Coronary heart disease                                                                                                                                                                                                                                  | 190,141 (7.4) | 404 (21.9) | 151 (18.3) | 253 (24.8) |
| * <a href="https://www.nice.org.uk/guidance/cg182/chapter/introduction#kidney-disease-improving-global-outcomes-gfr-categories">https://www.nice.org.uk/guidance/cg182/chapter/introduction#kidney-disease-improving-global-outcomes-gfr-categories</a> |               |            |            |            |

**Table 5: Association from univariate Poisson model for demographic and clinical characteristics of patients with hospitalisation or death due to COVID-19 illness following first vaccination dose**

| Characteristics                  | Unadjusted rate ratios (95% CI) |                     |                   |
|----------------------------------|---------------------------------|---------------------|-------------------|
|                                  | Both vaccines                   | BNT162b2            | ChAdOx1           |
| Time since first vaccination     |                                 |                     |                   |
| 14-20 days                       | 1.0                             | 1.0                 | 1.0               |
| 21-27 days                       | 0.70 (0.60-0.83)                | 0.72 (0.56-0.93)    | 0.68 (0.55-0.84)  |
| 28-34 days                       | 0.57 (0.47-0.68)                | 0.65 (0.50-0.84)    | 0.48 (0.36-0.62)  |
| 35-41 days                       | 0.47 (0.39-0.58)                | 0.44 (0.33-0.59)    | 0.48 (0.36-0.63)  |
| 42-128 days                      | 0.37 (0.32-0.43)                | 0.37 (0.30-0.46)    | 0.34 (0.27-0.42)  |
| Sex                              |                                 |                     |                   |
| Female                           | 1.0                             | 1.0                 | 1.0               |
| Male                             | 1.04 (0.93-1.17)                | 1.18 (1.00-1.39)    | 0.97 (0.83-1.14)  |
| Age group (years)                |                                 |                     |                   |
| 18-64                            | 1.0                             | 1.0                 | 1.0               |
| 65-79                            | 1.78 (1.50-2.10)                | 1.89 (1.48-2.42)    | 1.68 (1.34-2.12)  |
| ≥80                              | 10.03 (8.65-11.67)              | 35.47 (28.63-44.31) | 5.49 (4.48-6.77)  |
| Prior history of COVID-19*       |                                 |                     |                   |
| No                               | 1.0                             | 1.0                 | 1.0               |
| Yes                              | 1.18 (0.86-1.59)                | 1.35 (0.92-1.90)    | 0.81 (0.42-1.39)  |
| Prior history of hospitalisation |                                 |                     |                   |
| No                               | 1.0                             | 1.0                 | 1.0               |
| Yes                              | 4.83 (4.01-5.78)                | 5.09 (3.65-6.89)    | 5.15 (4.08-6.42)  |
| Elderly care home                |                                 |                     |                   |
| No                               | 1.0                             | 1.0                 | 1.0               |
| Yes                              | 26.53 (23.08-30.38)             | 32.28 (27.42-37.95) | 9.14 (2.27-23.79) |



| Deprivation status †                                             |                     |                     |                    |
|------------------------------------------------------------------|---------------------|---------------------|--------------------|
| 1 – Most deprived                                                | 2.00 (1.67-2.40)    | 1.77 (1.36-2.32)    | 2.22 (1.73-2.85)   |
| 2                                                                | 1.59 (1.32-1.92)    | 1.52 (1.16-2.00)    | 1.66 (1.29-2.16)   |
| 3                                                                | 1.05 (0.86-1.28)    | 1.34 (1.02-1.78)    | 0.80 (0.59-1.08)   |
| 4                                                                | 1.05 (0.85-1.28)    | 1.16 (0.87-1.54)    | 0.94 (0.70-1.26)   |
| 5 – Least deprived                                               | 1.0                 | 1.0                 | 1.0                |
| Urban/rural index                                                |                     |                     |                    |
| 1 (Large urban areas, Other urban areas, Accessible small towns) | 1.0                 | 1.0                 | 1.0                |
| 2 (Remote small towns, Accessible rural area, Remote rural area) | 0.78 (0.67-0.91)    | 1.22 (1.00-1.48)    | 0.48 (0.38-0.61)   |
| Smoking status                                                   |                     |                     |                    |
| Non-smoker                                                       | 1.0                 | 1.0                 | 1.0                |
| Smoker                                                           | 1.22 (1.05-1.42)    | 1.16 (0.93-1.45)    | 1.28 (1.04-1.56)   |
| Ex-smoker                                                        | 1.61 (1.38-1.86)    | 1.72 (1.38-2.13)    | 1.55 (1.27-1.90)   |
| Unknown                                                          | 1.07 (0.90-1.27)    | 1.43 (1.14-1.78)    | 0.66 (0.49-0.88)   |
| Number of risk groups ‡                                          |                     |                     |                    |
| 0                                                                | 1.0                 | 1.0                 | 1.0                |
| 1                                                                | 1.64 (1.35-2.01)    | 1.76 (1.30-2.39)    | 1.53 (1.17-2.01)   |
| 2                                                                | 3.99 (3.30-4.84)    | 5.95 (4.51-7.89)    | 2.94 (2.26-3.83)   |
| 3                                                                | 7.89 (6.50-9.60)    | 14.23 (10.79-18.87) | 5.04 (3.84-6.64)   |
| 4                                                                | 10.23 (8.18-12.78)  | 20.28 (14.82-27.71) | 6.06 (4.38-8.32)   |
| ≥ 5                                                              | 19.85 (16.13-24.43) | 40.71 (30.47-54.55) | 11.30 (8.36-15.23) |
| Number of previous tests §                                       |                     |                     |                    |
| 0                                                                | 1.0                 | 1.0                 | 1.0                |

|                                                                                                                                                                                                                                                                                                                                                                                                                                                                                                                                                                                                                                        |                     |                     |                   |
|----------------------------------------------------------------------------------------------------------------------------------------------------------------------------------------------------------------------------------------------------------------------------------------------------------------------------------------------------------------------------------------------------------------------------------------------------------------------------------------------------------------------------------------------------------------------------------------------------------------------------------------|---------------------|---------------------|-------------------|
| 1                                                                                                                                                                                                                                                                                                                                                                                                                                                                                                                                                                                                                                      | 2.26 (1.90-2.66)    | 3.04 (2.33-3.94)    | 1.95 (1.90-2.66)  |
| 2                                                                                                                                                                                                                                                                                                                                                                                                                                                                                                                                                                                                                                      | 4.92 (3.98-6.01)    | 7.92 (5.91-10.51)   | 3.41 (2.45-4.62)  |
| 3                                                                                                                                                                                                                                                                                                                                                                                                                                                                                                                                                                                                                                      | 10.97 (8.82-13.50)  | 21.90 (16.67-28.57) | 3.99 (2.43-6.14)  |
| 4-9                                                                                                                                                                                                                                                                                                                                                                                                                                                                                                                                                                                                                                    | 12.80 (10.88-15.01) | 20.05 (16.02-25.10) | 8.13 (6.05-10.71) |
| 10+                                                                                                                                                                                                                                                                                                                                                                                                                                                                                                                                                                                                                                    | 4.53 (3.51-5.76)    | 5.23 (3.78-7.11)    | 8.47 (5.16-13.04) |
| <p>* Unadjusted rate ratio for prior history of SARS-CoV-2 infection couldn't be estimated for individuals vaccinated with ChAdOx1 vaccine due to no hospitalisation or death due COVID-19 among them</p> <p>* <u>Prior history of hospitalisation status defined as a admission to hospital within 4 weeks prior to 1st dose vaccination</u></p> <p>† Deprivation status: Scottish Index of Multiple Deprivation (SIMD) 2020</p> <p>‡ Number of risk groups: Individual QCOVID risk groups found in supplementary table 7</p> <p>§ Number of previous tests: Proxy for working in a high-risk occupation (e.g. healthcare worker)</p> |                     |                     |                   |

**Table 6: Associations from multivariate Poisson models for demographic and clinical characteristics of patients with hospitalisation or death due to COVID-19 illness (U07.1 coding only) following first vaccination dose**

| Characteristics                  | Adjusted rate ratios (95% CI) |                   |                   |
|----------------------------------|-------------------------------|-------------------|-------------------|
|                                  | Both vaccines                 | BNT162b2          | ChAdOx1           |
| Time since first vaccination     |                               |                   |                   |
| 14-20 days                       | 1.0                           | 1.0               | 1.0               |
| 21-27 days                       | 0.61 (0.49, 0.75)             | 0.57 (0.39, 0.82) | 0.63 (0.49, 0.81) |
| 28-34 days                       | 0.30 (0.23, 0.39)             | 0.27 (0.16, 0.43) | 0.31 (0.23, 0.44) |
| 35-41 days                       | 0.27 (0.20, 0.36)             | 0.27 (0.17, 0.44) | 0.27 (0.19, 0.39) |
| 42-128 days                      | 0.11 (0.08, 0.14)             | 0.16 (0.11, 0.23) | 0.08 (0.06, 0.11) |
| Sex                              |                               |                   |                   |
| Female                           | 1.0                           | 1.0               | 1.0               |
| Male                             | 1.26 (1.06, 1.49)             | 1.37 (1.03, 1.82) | 1.17 (0.95, 1.43) |
| Age group (years)                |                               |                   |                   |
| 18-64                            | 1.0                           | 1.0               | 1.0               |
| 65-79                            | 1.66 (1.31, 2.10)             | 2.26 (1.49, 3.41) | 0.93 (0.65, 1.32) |
| ≥80                              | 3.19 (2.50, 4.06)             | 3.45 (2.17, 5.47) | 1.26 (0.83, 1.92) |
| Prior history of COVID-19*       |                               |                   |                   |
| No                               | 1.0                           | 1.0               | 1.0               |
| Yes                              | 0.00 (0.00, Inf)              | 0.00 (0.00, Inf)  | 0.00 (0.00, Inf)  |
| Prior history of hospitalisation |                               |                   |                   |
| No                               | 1.0                           | 1.0               | 1.0               |
| Yes                              | 3.16 (2.42, 4.14)             | 2.71 (1.49, 4.94) | 3.23 (2.38, 4.39) |
| Elderly care home                |                               |                   |                   |
| No                               | 1.0                           | 1.0               | 1.0               |

|                                                                  |                   |                   |                   |
|------------------------------------------------------------------|-------------------|-------------------|-------------------|
| Yes                                                              | 1.00 (0.72, 1.40) | 1.03 (0.68, 1.58) | 0.90 (0.12, 6.62) |
| Deprivation status †                                             |                   |                   |                   |
| 1 – Most deprived                                                | 0.61 (0.47, 0.80) | 0.72 (0.48, 1.10) | 0.55 (0.38, 0.78) |
| 2                                                                | 0.74 (0.58, 0.96) | 0.69 (0.45, 1.06) | 0.79 (0.57, 1.09) |
| 3                                                                | 0.57 (0.44, 0.75) | 0.59 (0.36, 0.94) | 0.56 (0.40, 0.78) |
| 4                                                                | 1.03 (0.83, 1.29) | 0.91 (0.63, 1.33) | 1.09 (0.82, 1.44) |
| 5 – Least deprived                                               | 1.0               | 1.0               | 1.0               |
| Urban/rural index                                                |                   |                   |                   |
| 1 (Large urban areas, Other urban areas, Accessible small towns) | 1.0               | 1.0               | 1.0               |
| 2 (Remote small towns, Accessible rural area, Remote rural area) | 1.08 (0.83, 1.40) | 0.98 (0.64, 1.50) | 1.13 (0.82, 1.57) |
| Smoking status                                                   |                   |                   |                   |
| Non-smoker                                                       | 1.0               | 1.0               | 1.0               |
| Smoker                                                           | 1.14 (0.92, 1.41) | 1.28 (0.90, 1.84) | 1.04 (0.79, 1.36) |
| Ex-smoker                                                        | 1.24 (1.00, 1.54) | 1.28 (0.88, 1.85) | 1.21 (0.93, 1.57) |
| Unknown                                                          | 0.97 (0.72, 1.29) | 0.77 (0.50, 1.18) | 1.25 (0.83, 1.88) |
| Number of risk groups ‡                                          |                   |                   |                   |
| 0                                                                | 1.0               | 1.0               | 1.0               |
| 1                                                                | 1.37 (1.03, 1.81) | 1.55 (1.00, 2.41) | 1.15 (0.80, 1.65) |
| 2                                                                | 2.48 (1.88, 3.28) | 3.00 (1.91, 4.71) | 1.91 (1.34, 2.72) |
| 3                                                                | 2.92 (2.15, 3.96) | 3.49 (2.10, 5.83) | 2.19 (1.50, 3.22) |
| 4                                                                | 2.79 (1.95, 3.99) | 1.80 (0.89, 3.66) | 2.71 (1.78, 4.14) |

|                                                                                                                                                                                                  |                   |                   |                   |
|--------------------------------------------------------------------------------------------------------------------------------------------------------------------------------------------------|-------------------|-------------------|-------------------|
| ≥5                                                                                                                                                                                               | 4.98 (3.57, 6.93) | 5.17 (2.95, 9.05) | 4.04 (2.67, 6.10) |
| Number of previous tests §                                                                                                                                                                       |                   |                   |                   |
| 0                                                                                                                                                                                                | 1.0               | 1.0               | 1.0               |
| 1                                                                                                                                                                                                | 1.69 (1.33, 2.15) | 2.01 (1.30, 3.11) | 1.65 (1.23, 2.20) |
| 2                                                                                                                                                                                                | 2.29 (1.68, 3.14) | 2.99 (1.79, 4.99) | 2.12 (1.40, 3.20) |
| 3                                                                                                                                                                                                | 2.45 (1.66, 3.60) | 3.44 (1.95, 6.07) | 2.02 (1.12, 3.63) |
| 4-9                                                                                                                                                                                              | 3.25 (2.46, 4.29) | 4.54 (2.91, 7.11) | 2.86 (1.91, 4.27) |
| 10+                                                                                                                                                                                              | 1.69 (1.11, 2.57) | 1.91 (1.07, 3.41) | 2.76 (1.39, 5.46) |
| * Adjusted rate ratio for prior history of SARS-CoV-2 infection couldn't be estimated for individuals vaccinated with ChAdOx1 vaccine due to no hospitalisation or death due COVID-19 among them |                   |                   |                   |
| † Deprivation status: Scottish Index of Multiple Deprivation (SIMD) 2020                                                                                                                         |                   |                   |                   |
| ‡ Number of risk groups: Individual QCOVID risk groups found in supplementary table 7                                                                                                            |                   |                   |                   |
| § Number of previous tests: Proxy for working in a high-risk occupation (e.g. healthcare worker)                                                                                                 |                   |                   |                   |

**Table 7: QCovid risk groups and codes**

| <b>QCOVID risk group</b>    | <b>Code</b>         |
|-----------------------------|---------------------|
| Atrial fibrillation         | Q_DIAG_AF           |
| Asthma                      | Q_DIAG_ASTHMA       |
| Blood cancer                | Q_DIAG_BLOOD_CANCER |
| Heart failure               | Q_DIAG_CCF          |
| Cerebral palsy              | Q_DIAG_CEREBALPALSY |
| Coronary heart disease      | Q_DIAG_CHD          |
| Cirrhosis                   | Q_DIAG_CIRRHOSIS    |
| Congenital heart disease    | Q_DIAG_CONGEN_HD    |
| COPD                        | Q_DIAG_COPD         |
| Dementia                    | Q_DIAG_DEMENTIA     |
| Diabetes type 1             | Q_DIAG_DIABETES_1   |
| Diabetes type 2             | Q_DIAG_DIABETES_2   |
| Epilepsy                    | Q_DIAG_EPILEPSY     |
| Fracture                    | Q_DIAG_FRACTURE     |
| Neurological disorder       | Q_DIAG_NEURO        |
| Parkinson's                 | Q_DIAG_PARKINSONS   |
| Pulmonary hypertension      | Q_DIAG_PULM_HYPER   |
| Pulmonary rare              | Q_DIAG_PULM_RARE    |
| Peripheral vascular disease | Q_DIAG_PVD          |
| Rheumatoid arthritis or SLE | Q_DIAG_RA_SLE       |

|                                                                                                                                                                                                                                                                                                                                                                                   |                    |
|-----------------------------------------------------------------------------------------------------------------------------------------------------------------------------------------------------------------------------------------------------------------------------------------------------------------------------------------------------------------------------------|--------------------|
| Respiratory cancer                                                                                                                                                                                                                                                                                                                                                                | Q_DIAG_RESP_CANCER |
| Severe mental illness                                                                                                                                                                                                                                                                                                                                                             | Q_DIAG_MENT_ILL    |
| Sickle cell disease                                                                                                                                                                                                                                                                                                                                                               | Q_DIAG_SICKLE_CELL |
| Stroke/TIA                                                                                                                                                                                                                                                                                                                                                                        | Q_DIAG_STROKE      |
| Thrombosis or pulmonary embolus                                                                                                                                                                                                                                                                                                                                                   | Q_DIAG_VTE         |
| Care housing category                                                                                                                                                                                                                                                                                                                                                             | Q_HOME_CAT         |
| Learning disability or Down's                                                                                                                                                                                                                                                                                                                                                     | Q_LEARN_CAT        |
| Kidney disease                                                                                                                                                                                                                                                                                                                                                                    | Q_DIAG_CKD_LEVEL   |
| <p>More information on codes: <a href="https://github.com/EAVE-II/EAVE-II-data-dictionary">https://github.com/EAVE-II/EAVE-II-data-dictionary</a><br/> Ref: Clift, A.K., et al. Living risk prediction algorithm (QCOVID) for risk of hospital admission and mortality from coronavirus 19 in adults: national derivation and validation cohort study. BMJ 371, m3731 (2020).</p> |                    |

Figure 1: Severe COVID-19 outcomes by age and vaccine type (AZ – Oxford-AstraZeneca, PB: Pfizer-BioNTech) (A) hospitalisation or death combined (B) hospitalisation (C) deaths. The x-axis represents age groups and y-axis represents the number of incidents.

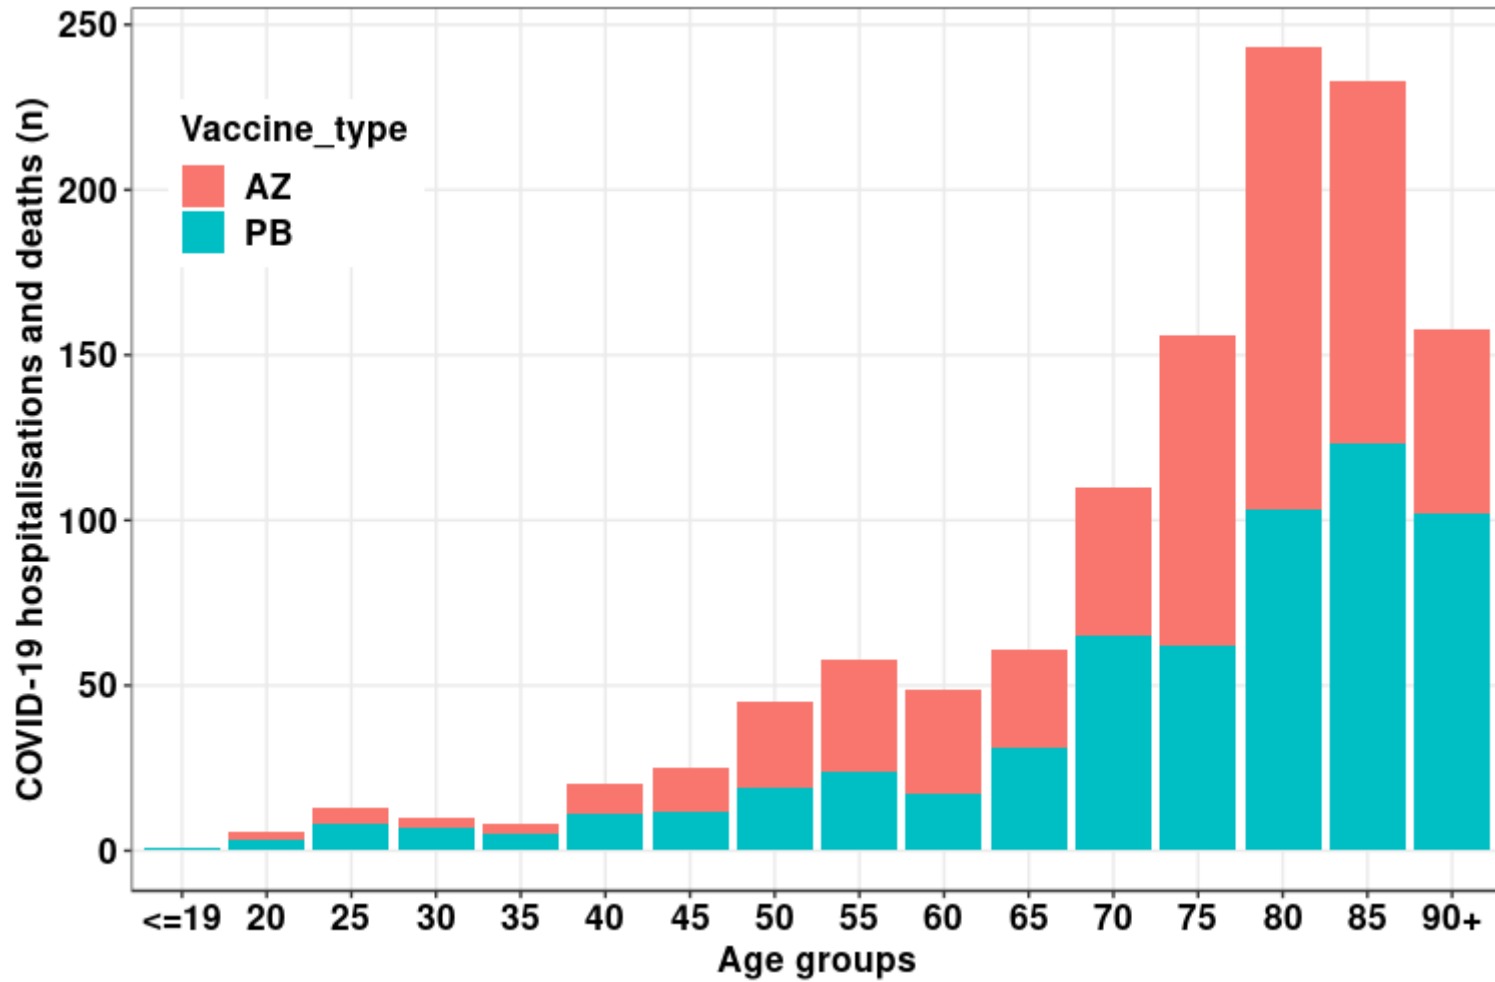

A. Hospitalisation or death due to COVID-19 by age groups



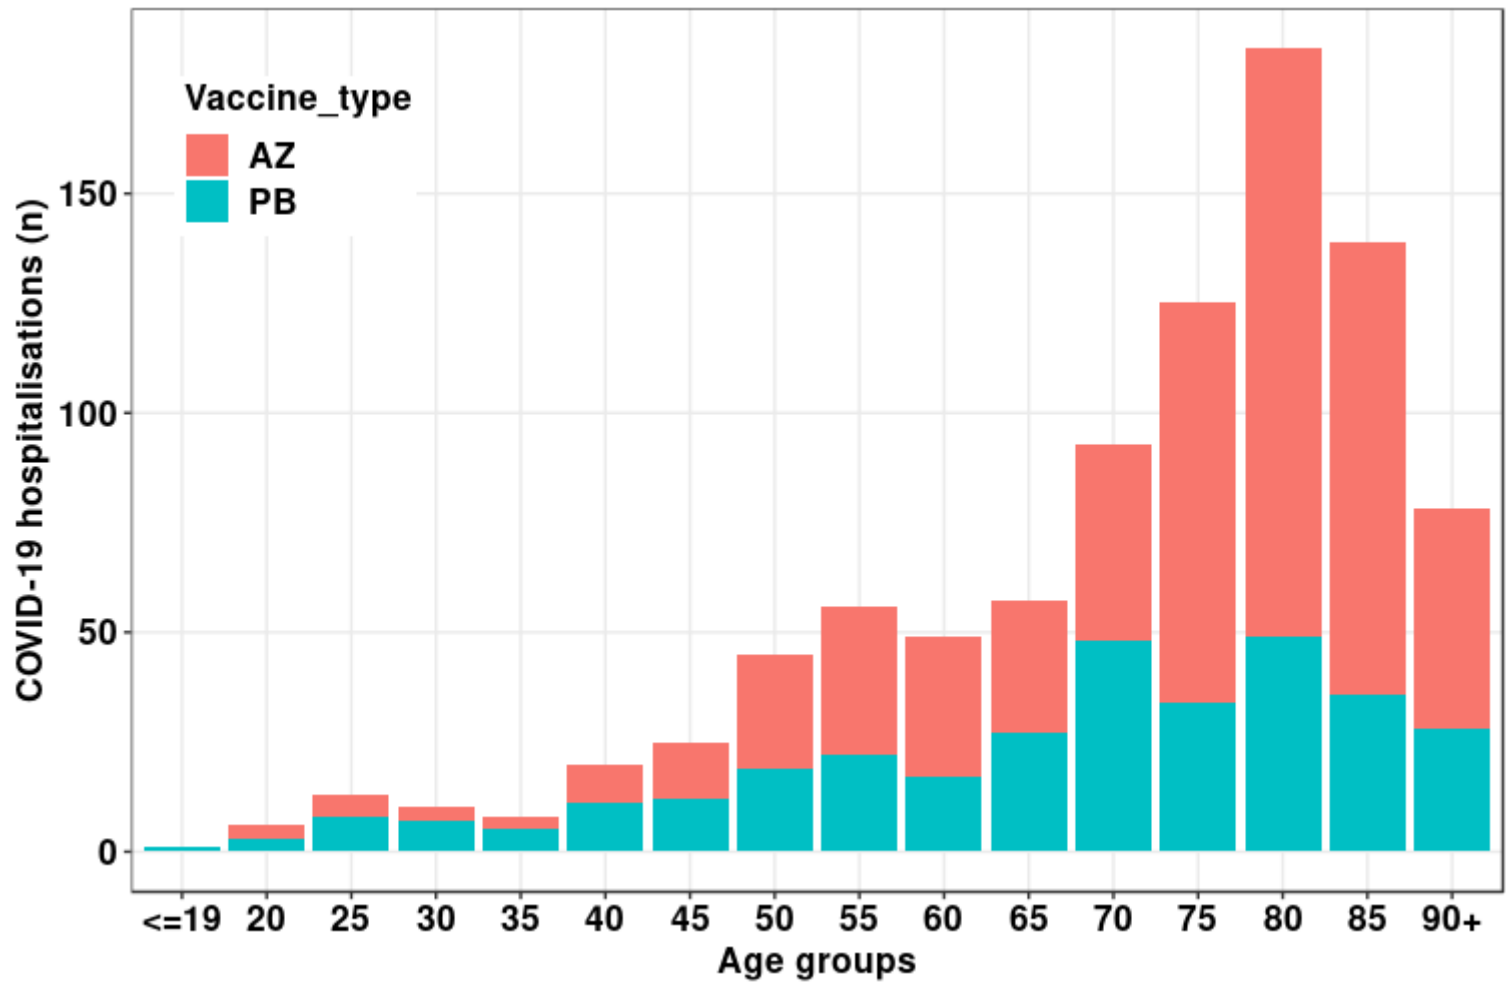

B. Hospitalisation due to COVID-19 by age groups

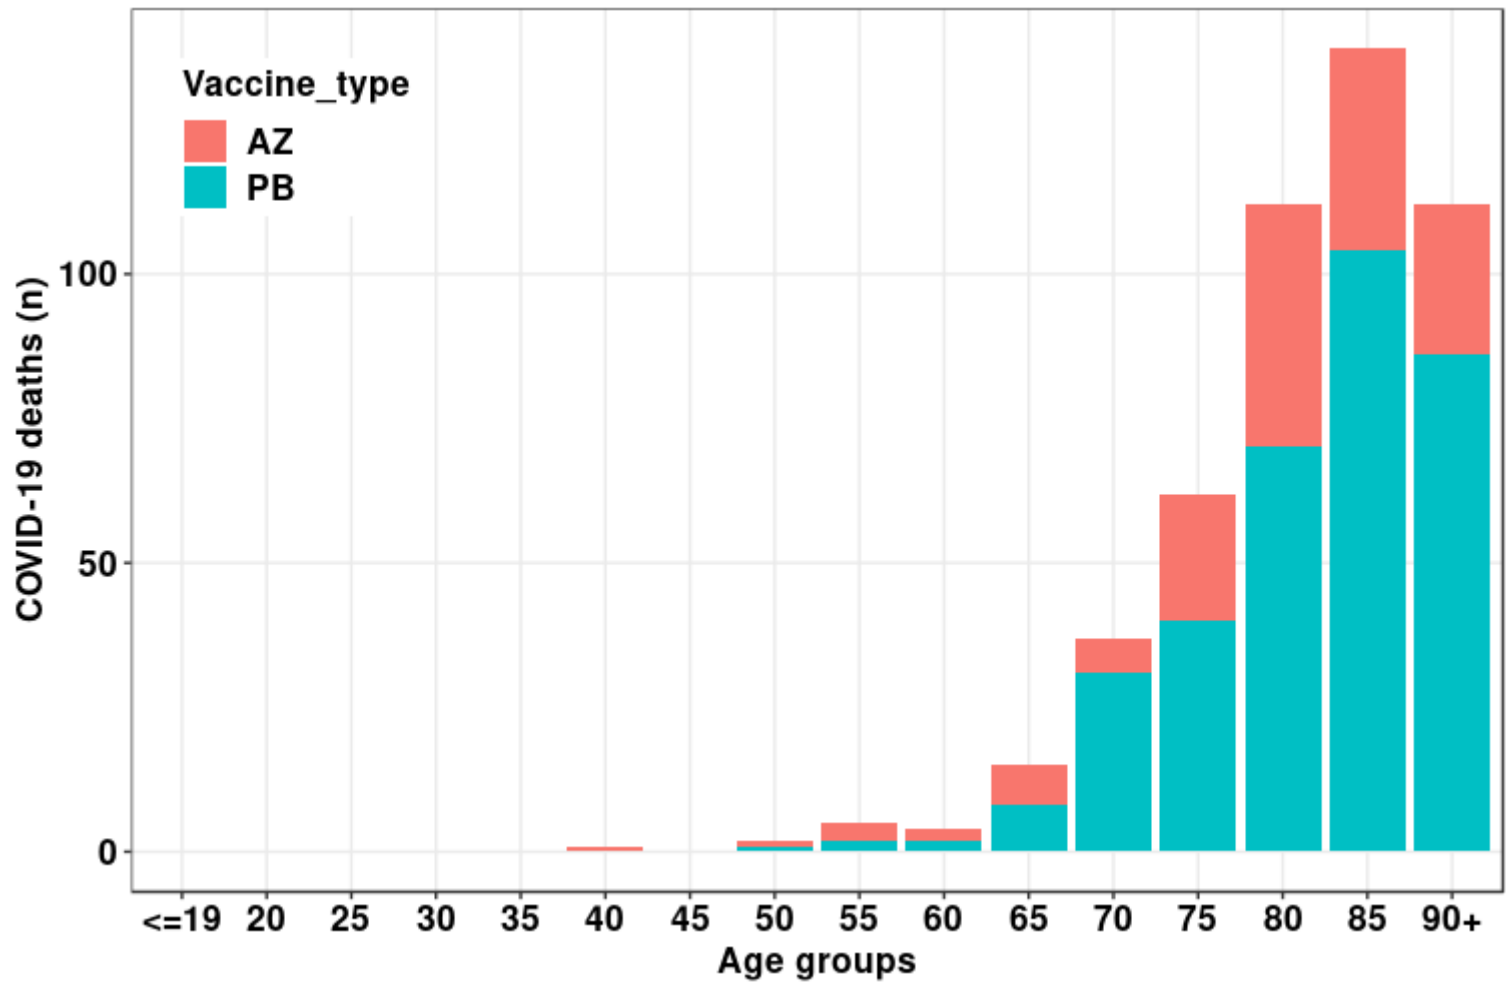

C. Deaths due to COVID-19 by age groups

**Figure 2: Plots comparing the proportion of individuals vaccinated and proportion of individuals with events by (A) age groups, (B) number of different conditions (QCovid Risk Groups), and (C) socioeconomic status measured by SIMD (1=most deprived, 5=least deprived)**

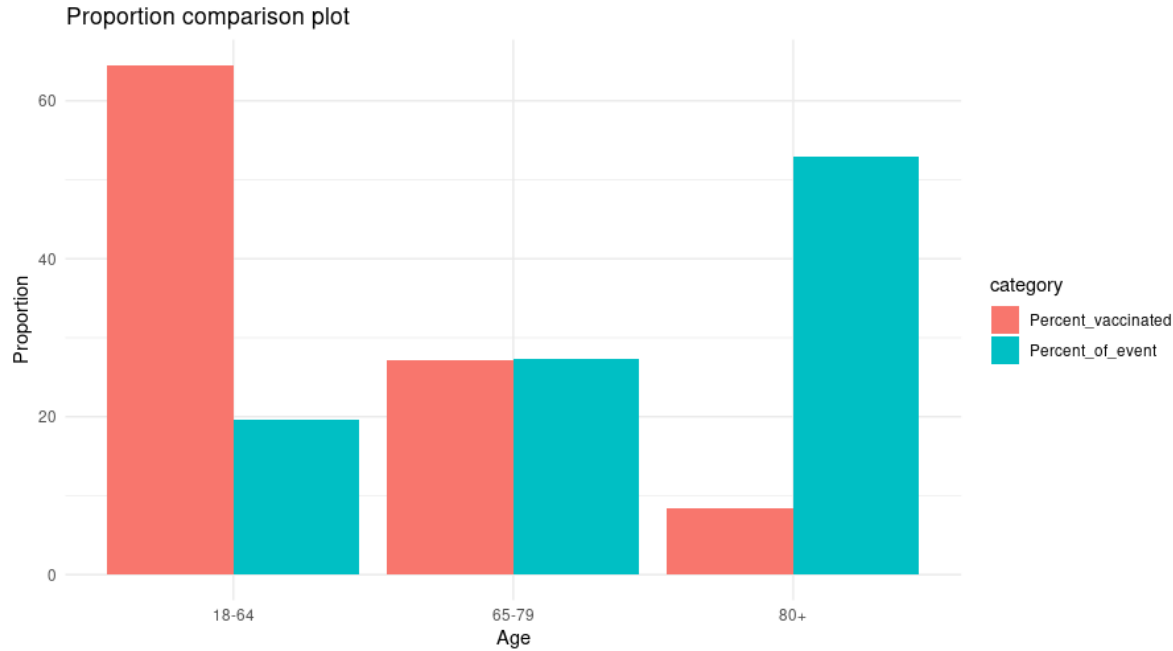

**A. Proportion of individuals vaccinated and proportion of individuals with events by age group**

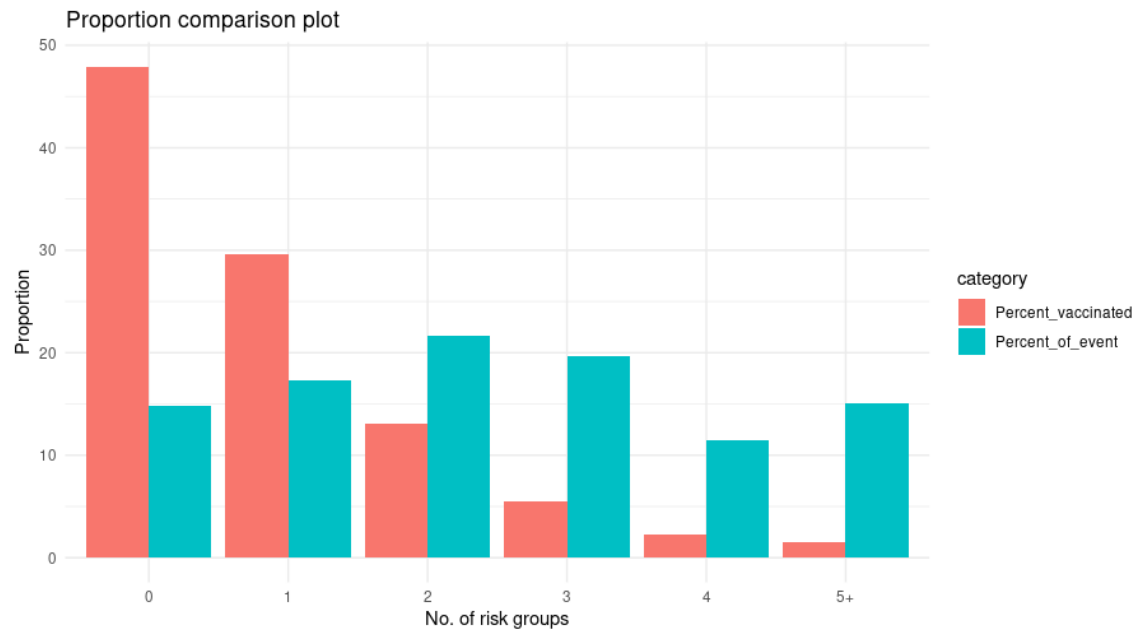

**B. Proportion of individuals vaccinated and proportion of individuals with events by number of different conditions (QCovid Risk Groups)**

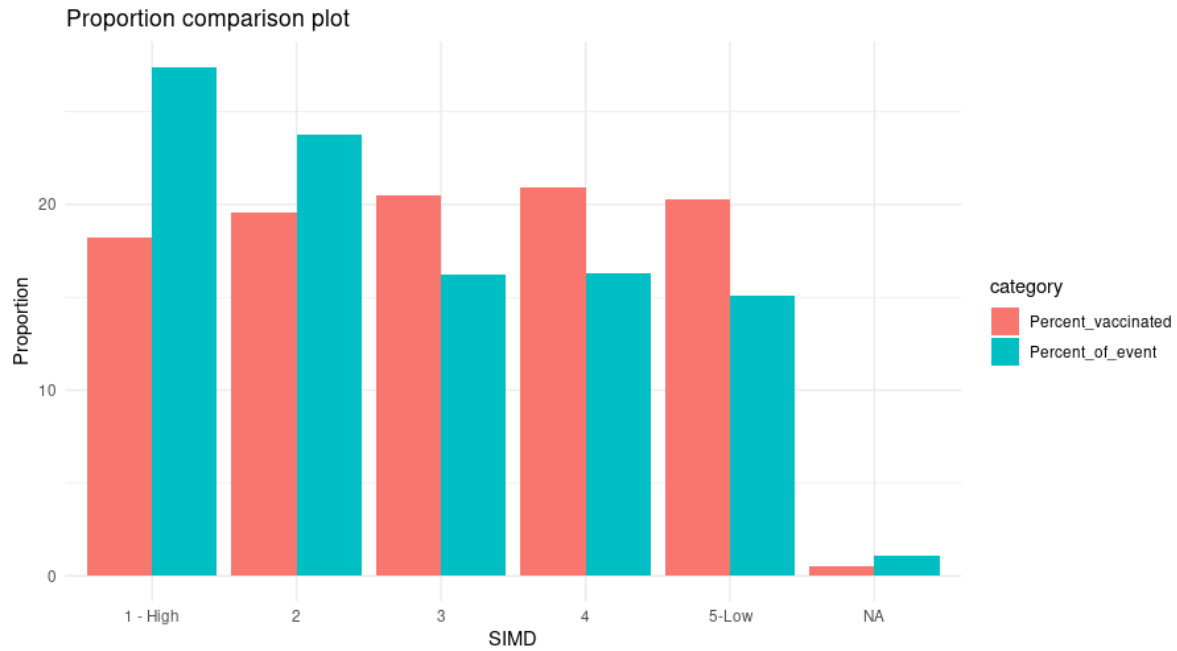

**C. Proportion of individuals vaccinated and proportion of individuals with events by socioeconomic status measured by SIMD (1=most deprived, 5=least deprived)**

**Figure 3: Cumulative incidence of hospitalisation or death due to COVID-19 for vaccine type (A), age groups (B), number of risk groups (C) and socio-economic status (D). X-axis represents number of days post-vaccination and y-axis represents the cumulative incidence\***

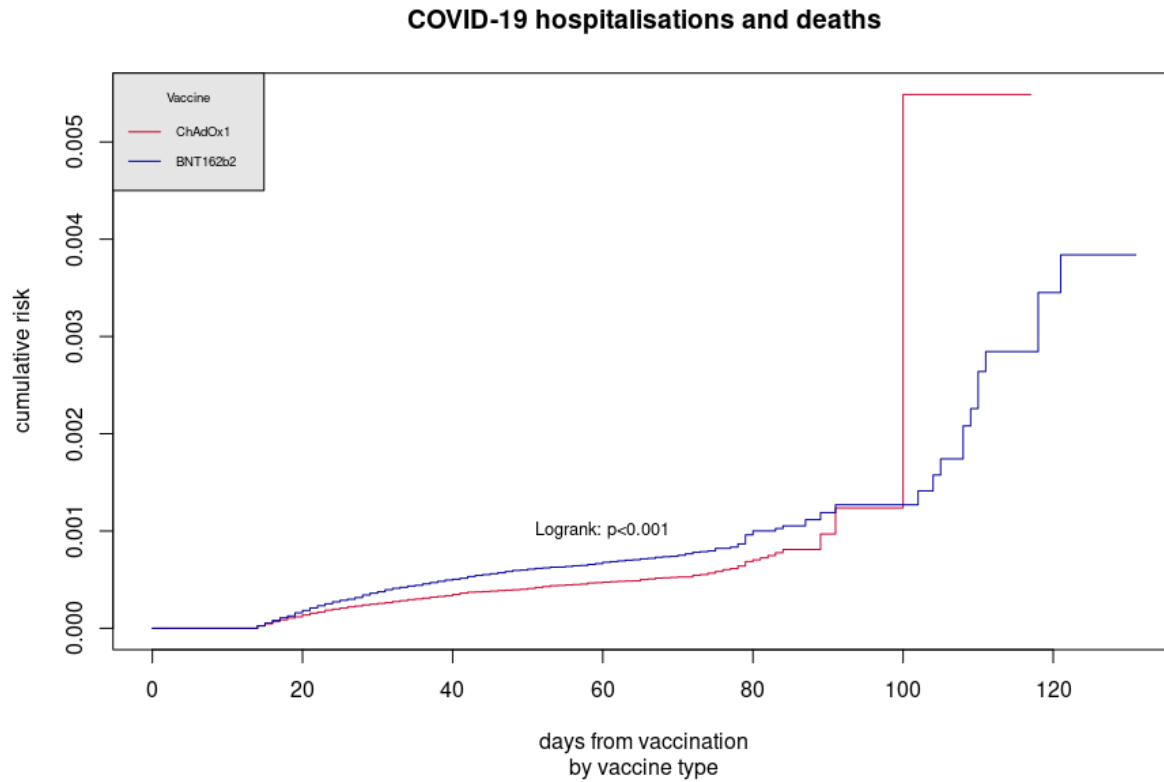

A. Cumulative risk by vaccine type

### COVID-19 hospitalisations and deaths

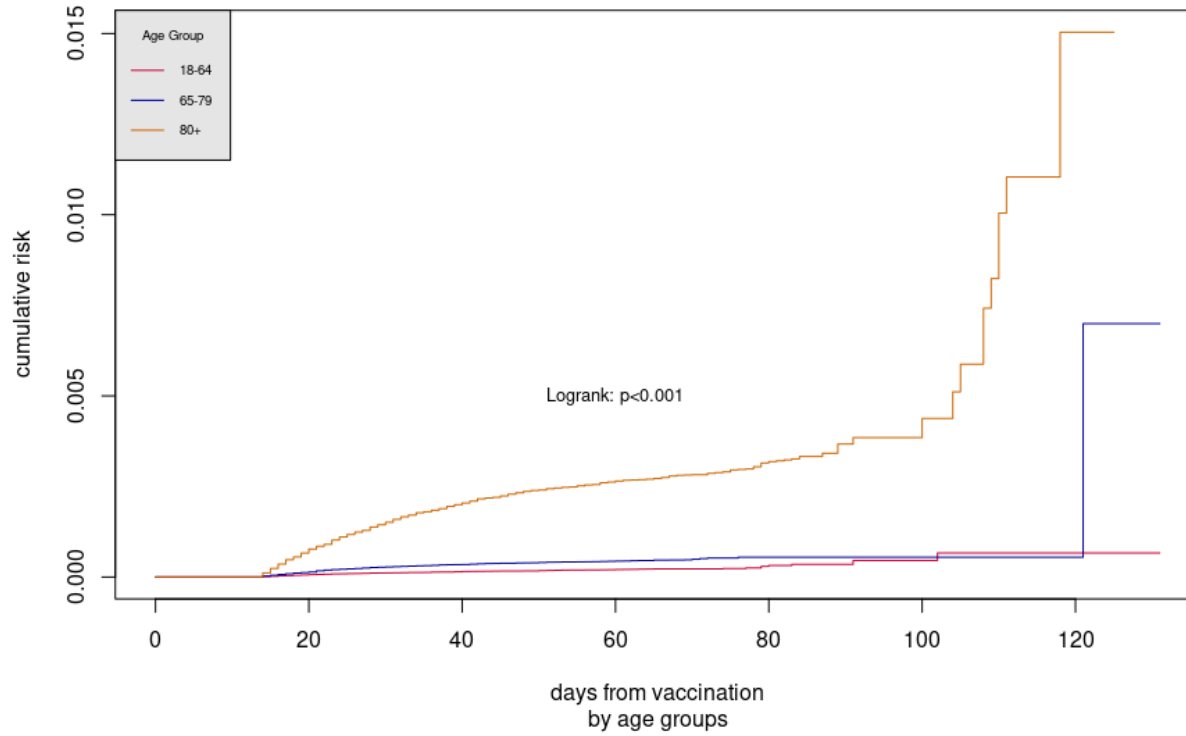

B. Cumulative risk by age groups

### COVID-19 hospitalisations and deaths

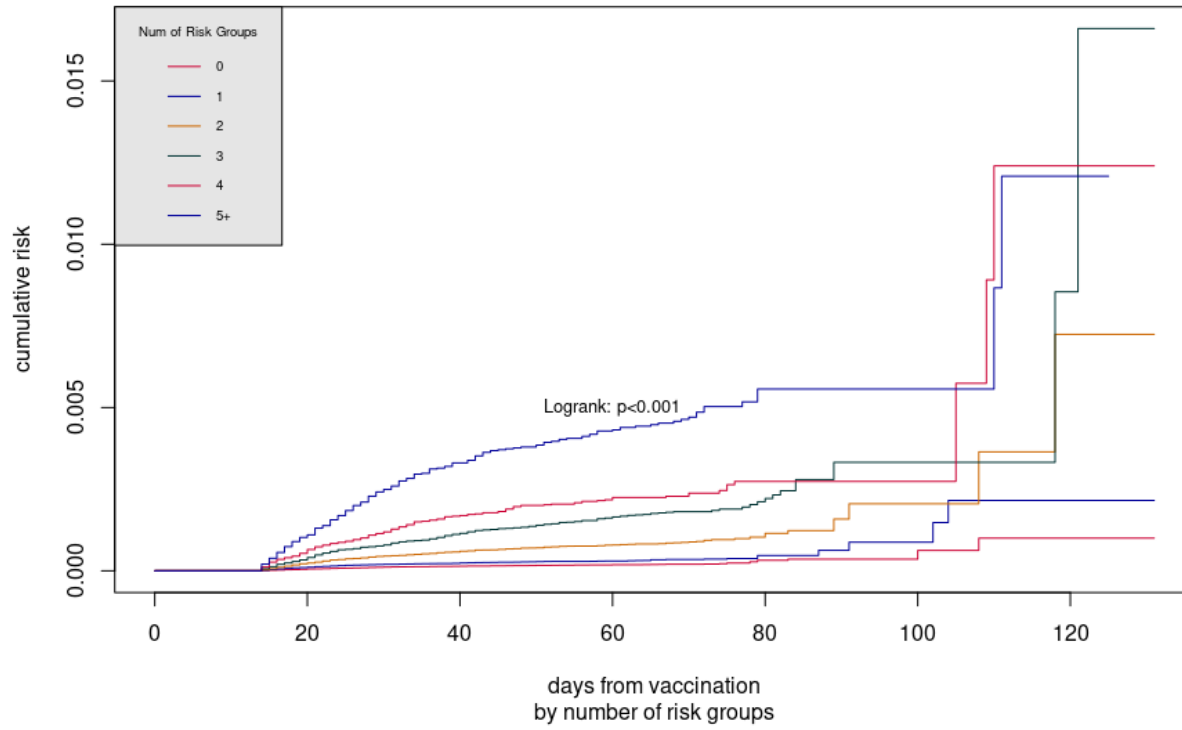

C. Cumulative risk by number of risk groups



### COVID-19 hospitalisations and deaths

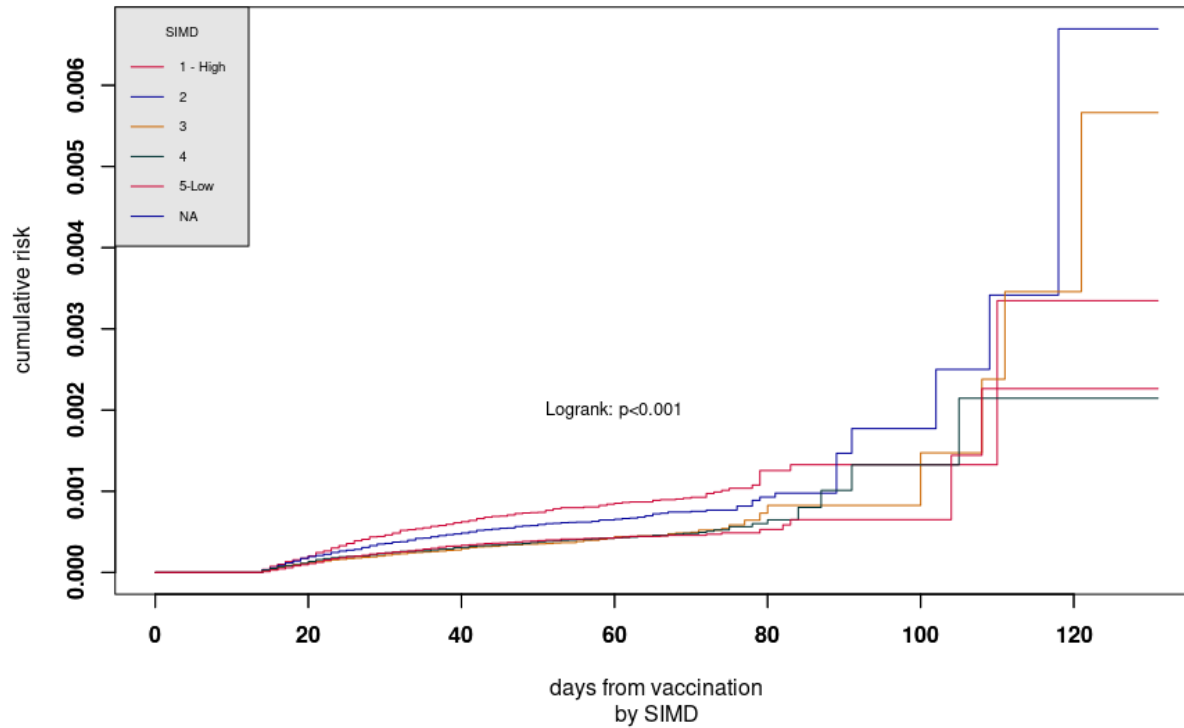

#### D. Cumulative risk by deprivation status

(1 - High represents most deprived group and 5 - Low represents least deprived group)

\*Please note the y-axis scale differs between figures which are reported unadjusted

|                 | 20        | 40        | 60        | 80        | 100    | 120   |
|-----------------|-----------|-----------|-----------|-----------|--------|-------|
| Numbers at risk | 2,411,612 | 2,266,813 | 1,661,549 | 1,065,542 | 95,999 | 7,613 |

|          |         |         |         |         |        |       |
|----------|---------|---------|---------|---------|--------|-------|
| Censored | 144,438 | 604,755 | 595,792 | 969,456 | 88,374 | 7,601 |
| Events   | 361     | 509     | 215     | 87      | 12     | 12    |
